# Supplementary material for: Rapid Visco Analyzer Measurements ofjaponicaRice Cultivars to Study Interrelationship between Pasting Properties and Farming System
Source: Hindawi journal article supplement (doi:10.1155/2016/3595326), 2016-01-01
Supplement: f1 [file 3595326.f1.docx]

**APPENDIX**

APPENDIX 1: Comparative analysis of physiochemical properties influenced by various factors such as cultivars, seasons or different treatments in rice grains (mean values of 2 years) [14].

| Factors | | | Springiness | Amylose content (%) | Crude protein (%) | Gel consistency (mm) |
| --- | --- | --- | --- | --- | --- | --- |
| Treatments | | conventional | 6.0a | 18.8a | 6.38a | 93.3a |
| organic | 6.01a | 18.4b | 6.18b | 90.8b |
|  | | | | | | |
| Cultivars | TK-16 | | 6.01a | 17.3b | 6.30a | 93.6a |
| KSH-139 | | 6.0b | 19.9a | 6.26b | 90.5b |
|  | | | | | | |
| Seasons | spring | | 6.01a | 18.0b | 6.19b | 96.0a |
| fall | | 6.0a | 19.2a | 6.37a | 88.1b |
|  |  | |  |  |  |  |
|  |  | | F-values | | | |
| *parameter* | | | ****** | ******** | ******** | ******** |
| *season (S)* | | | ns | ******** | ******** | ******** |
| *treatment (T)* | | | ns | ******** | ******** | ******* |
| *cultivar (C)* | | | ns | ******** | ns | ******** |
| *S*T* | | | ns | ******** | ******** | ******** |
| *S*C* | | | ns | ******** | ******** | ****** |
| *T*C* | | | ns | ******** | ******** | ******** |
| *S*T*C* | | | ns | ******** | ns | ******** |

Values for each parameter followed by a different letter within each column are significantly different, *P ≤* 0*.*05 (Duncan’s Multiple Range Test). Taikeng No.16 = TK-16; Kaohsiung No.139 = KSH-139; ns = values statistically non-significant (P >0.05). ****=** P *≤* 0.01; ***** =** P *≤* 0.001; ******** = P *≤* 0.0001

APPENDIX 2: F-values of Sensory Panel Score of Rice Cultivars Influenced by Agricultural Practice in Two Crop Seasons [13].

| Parameter | Appearance | Aroma | Flavor | Cohesion | Hardness | Overall |
| --- | --- | --- | --- | --- | --- | --- |
| Organic | -0.72b | -0.49a | -0.59a | -0.64a | 0.40a | -0.66a |
| Conventional | -0.58a | -0.62b | -0.55a | -0.59a | 0.49a | -0.60a |
| F-values | | | | | | |
| Properties | **** | **** | **** | **** | **** | **** |
| *season (S)* | ns | ns | ns | * | ns | ns |
| *treatment (T)* | **** | *** | ns | ns | ns | ns |
| *cultivar (C)* | **** | **** | **** | **** | **** | **** |
| *S*T* | **** | **** | **** | **** | ** | **** |
| *S*C* | **** | **** | **** | **** | **** | **** |
| *T*C* | ns | **** | *** | ** | **** | ns |
| *S*T*C* | **** | **** | **** | **** | **** | **** |

Values for each parameter followed by a different letter within each row are significantly different, *P ≤* 0*.*05 (Duncan’s Multiple Range Test). Rating evaluated by sensory panelists in comparison with rice cultivar Taikeng No.9 which cultivated in chemical farming, as a Control. Where ‘+, 0 and –’ denote ratings higher, equal to, and lower than the control, respectively. ns = values statistically non-significant (P >0.05). * = P *≤*0.05; ** = P *≤* 0.01; *** = P *≤* 0.001; **** = P *≤* 0.0001

APPENDIX 3: Detail of physiochemical properties of cultivar TK-16 rice collected from farmer’s market and field [13].

| Properties of white rice | Taikeng No. 16 | |
| --- | --- | --- |
| Nutritional value (per 100 g) | Conventional | Organic |
| Calories (kcal) | 355 | 354 |
| Protein (g) | 5.2 | 4.9 |
| Fat (g) | 1.3 | 1.2 |
| a. saturated (g) | 0.5 | 0.4 |
| b. unsaturated (g) | 0 | 0 |
| Carbohydrate (g) | 78.6 | 80.9 |
| Sodium (mg) | 4 | 4 |

APPENDIX 4: Detail of physiochemical properties of cultivar KSH-139 rice collected from farmer’s market and field [13].

| Properties of white rice | Kaohsiung No. 139 | |
| --- | --- | --- |
| A. permissible limit | Conventional | Organic |
| Shape | Short and bold | Short and bold |
| Moisture (%) | 14.5 | 14.5 |
| Foreign particles (%) | 0.2 | 0.1 |
| Bran (%) | 0 | 0 |
| Brown rice (%) | 0 | 0 |
| Heat damaged kernels (%) | 0.3 | 0.1 |
| Damaged kernels (%) | 2 | 1 |
| Off-type kernel (%) | 3 | 1 |
| Broken kernel (%) | 10 | 5 |
| Chalky kernel (%) | 10 | 5 |
| Non-opaque waxy kernel (%) | - | - |
| B. Nutritional value (per 100 g) |  |  |
| Calories (kcal) | 356 | 349.7 |
| Protein (g) | 6.8 | 5.3 |
| Fat (g) | 1.3 | 0.5 |
| a. saturated (g) | 0.3 | - |
| b. unsaturated (g) | 0 | - |
| Carbohydrate (g) | 75.5 | 81.1 |
| Sodium (mg) | 4 | 12.3 |
